# Supplementary material
Source: Springer Nature journal article supplement (https://www.springermedizin.de/resource/supplementary/12887_2013_953_MOESM4_ESM.pdf/9476876)

**Figure 4: National trend for stunting compared to trends for girls aged 12-23 months, girls in Rift-Valley province, girls in Urban residence and girls in Richest WI**

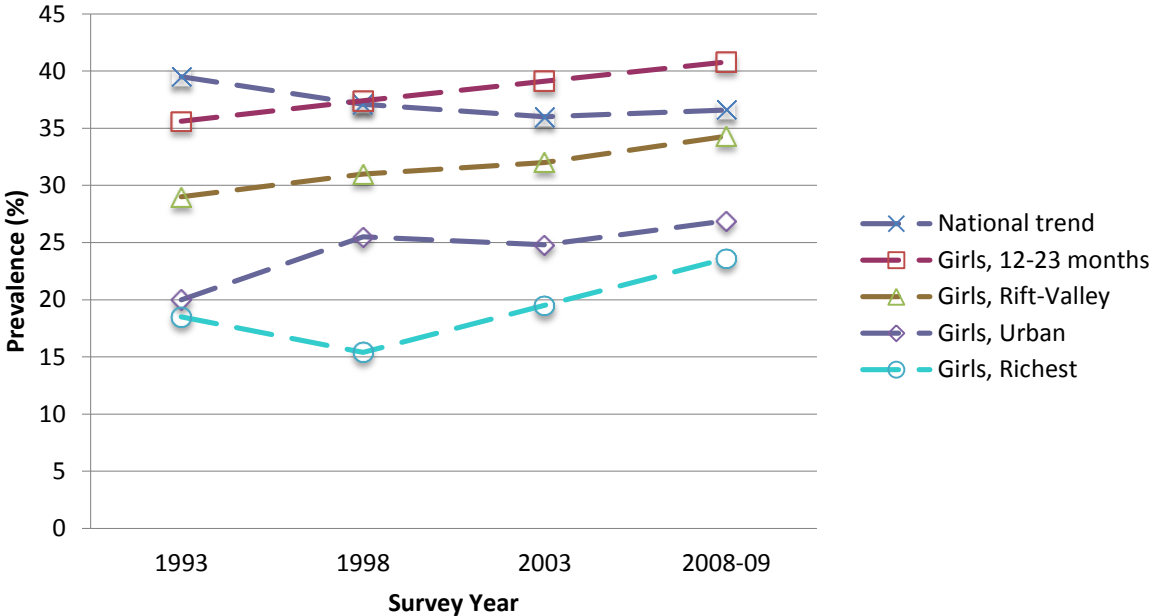

Supplement: MOESM4 [file 9476876]
